# Supplementary material for: Disruption of the Lotus japonicus transporter LjNPF2.9 increases shoot biomass and nitrate content without affecting symbiotic performances
Source: PubMed Central journal article supplement (PMC6717371; doi:10.1186/s12870-019-1978-5), 2019-08-30
Supplement: 12870_2019_1978_MOESM3_ESM.pdf [file 12870_2019_1978_MOESM3_ESM.pdf]

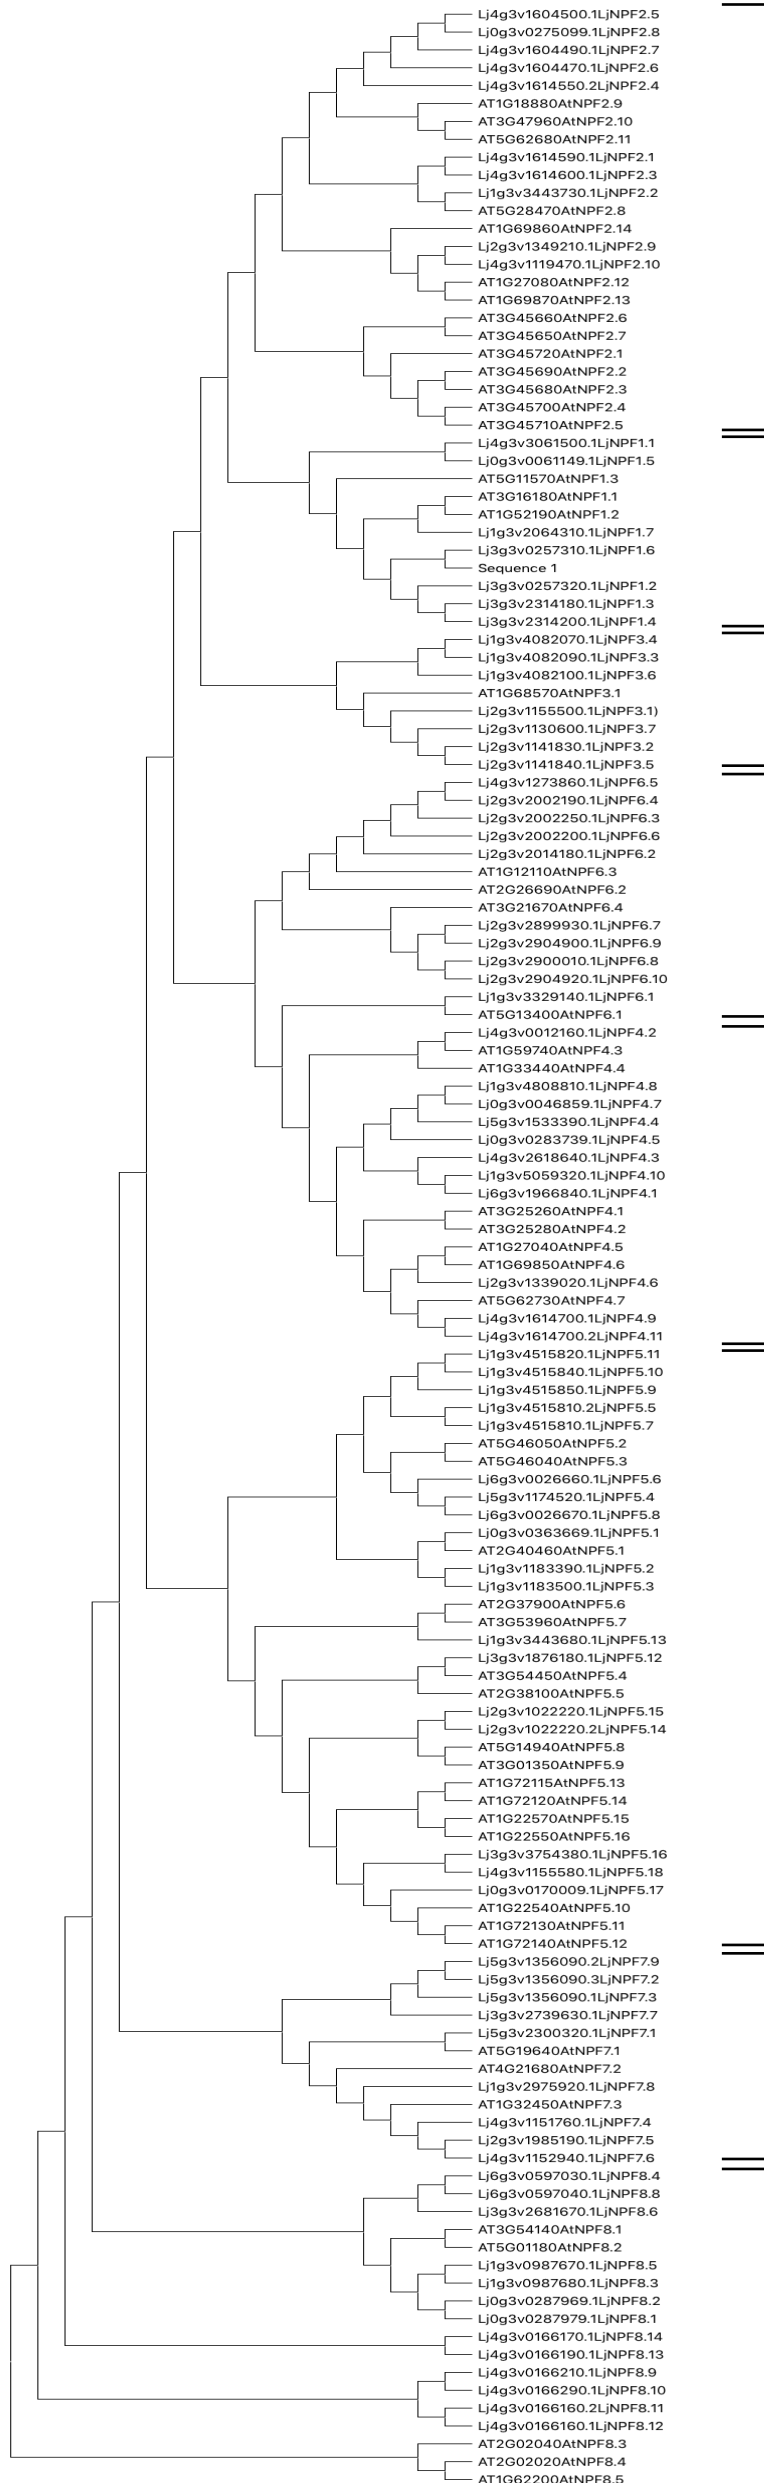

Clade 2

Clade 1

Clade 3

Clade 6

Clade 4

Clade 5

Clade 7

Clade 8
