# Supplementary material for: Disruption of the Lotus japonicus transporter LjNPF2.9 increases shoot biomass and nitrate content without affecting symbiotic performances
Source: PubMed Central journal article supplement (PMC6717371; doi:10.1186/s12870-019-1978-5), 2019-08-30

**a**

MLGARDKRTNLSGFPFSSWSLVCCRSGFNSSSSAPQKDLNNENLTKNCSSESSNKKKPG  
GWKAMPFILGN**ETFERLA**AFGLFANFMVYLTREFHLNQVDASNILNIWSGITNFFPLVGA  
FISDAYVGRFRRTIAFASFSSLLGMIMITLTAWLPKLPHPPCSPQQLASNQCVKASTTHVG  
SLGIGLFFLSIGSAGIRPCSIPFGVDQFDPTTDEGKKGINSFFNWYYTFTTVLLITQTV  
VVYVQDSVSWKIGFAIPTLCMFCSIIFFFVGTRIYVHVKPEGSIFSSIAQVLVAAYRKRN  
VNLPSKQVDGVFYDPPLKESAALSKLPFTNQFRILNKAALIMEGEVNPDGSRVNQWNLV  
SIQQVEEIKCLARIFPIWAAGILGFTAMAQQGTFTVSQAMKMDRHIGSKFQIPAGSLGVI  
SFITIGLVVPFYDRFFVPALRRITKHEGGITLLQRIGIGMVFSVLSMIVAGLVEKVRRGV  
ANSNPPLGIAPMSVMWLAPQLVLMGLCEAFNAIGLIEFFNRQFPEHMRSIANALFSCSF  
ALASYVSSILVSTVHHATRTHSHPDWLTNDINAGRLDYFYLIAGIGVLNLIYFLYVAQG  
YHYKGSVELQGKEDVELGSKGELDYTGPRFEDSK

**b**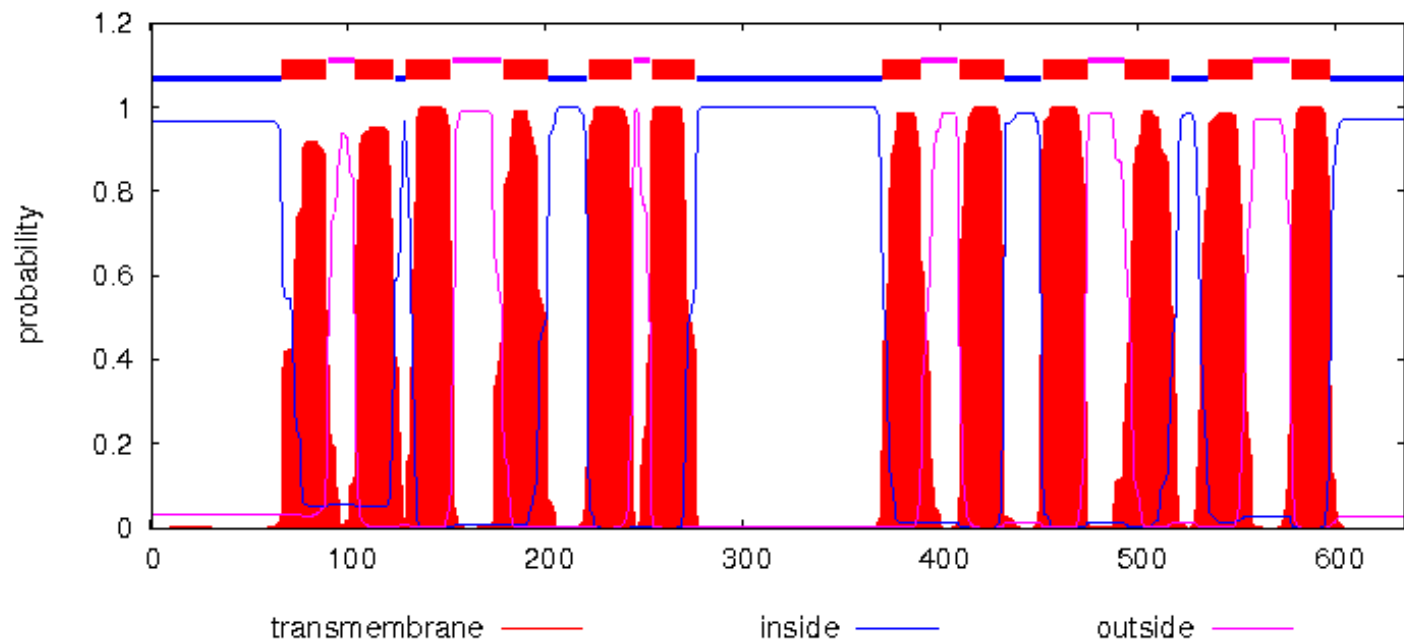

Supplement: 12870_2019_1978_MOESM4_ESM.pdf [file 12870_2019_1978_MOESM4_ESM.pdf]
