# Supplementary material for: Disruption of the Lotus japonicus transporter LjNPF2.9 increases shoot biomass and nitrate content without affecting symbiotic performances
Source: PubMed Central journal article supplement (PMC6717371; doi:10.1186/s12870-019-1978-5), 2019-08-30

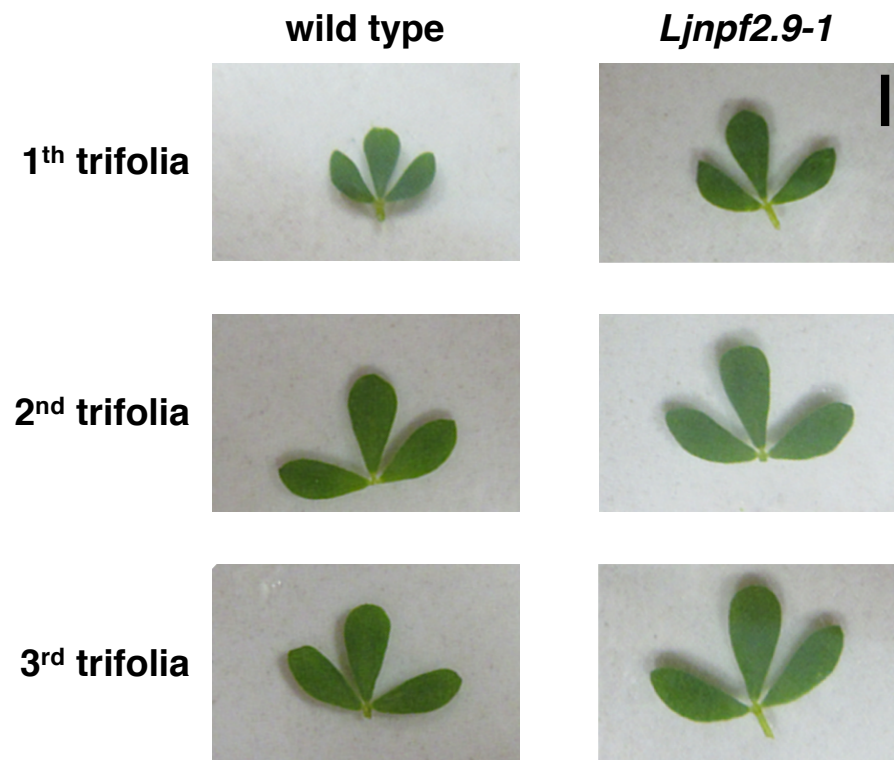

Supplement: 12870_2019_1978_MOESM5_ESM.pdf [file 12870_2019_1978_MOESM5_ESM.pdf]
